# Supplementary material for: Advanced HIL strategies in QLEDs: V2O5 and PEDOT:PSS dual-layer for charge balance and electron leakage prevention
Source: Royal Society of Chemistry journal article supplement (doi:10.1039/d3tc04652d), 2024-01-01
Supplement: d3tc04652d1.pdf [file d3tc04652d1.pdf]

## Supporting information

# Advanced HIL strategies in QLEDs:V<sub>2</sub>O<sub>5</sub> and PEDOT:PSS dual-layer for charge balance and electron leakage prevention

Han Bin Cho,<sup>a</sup> Ha Jun Kim,<sup>a</sup> Noolu Srinivasa Manikanta Viswanath,<sup>a</sup> Tuhin Samanta,<sup>a</sup> Jeong Wan Min,<sup>a</sup> Sung Woo Jang,<sup>a</sup> Yong Min Park,<sup>a</sup> Se Hyuk Jang,<sup>a</sup> Heesun Yang,<sup>\*b</sup> and Won Bin Im<sup>\*a</sup>

<sup>a</sup>*Division of Materials Science and Engineering, Hanyang University, 222 Wangsimni-ro, Seongdong-gu, Seoul, 04763, Republic of Korea*

<sup>b</sup>*Department of Materials Science and Engineering, Hongik University, 94 Wausan-ro, Mapo-gu, Seoul 04066, Republic of Korea*

Corresponding Author E-mail: hyang@hongik.ac.kr, imwonbin@hanyang.ac.kr

## Experimental section

**Materials** Vanadium (V) oxytriisopropoxide was purchased from Sigma-Aldrich. PEDOT:PSS (AI 4083) was purchased from Heraeus. Poly (9-vinyl carbazole) (MW = 90,000) was purchased from Acros. Isopropyl alcohol (99.5%) was purchased from Daejung Chemicals & Metals Co. Ltd. Aluminum (99.999%) was purchased from ITASCO. All chemicals were used without any additional purification steps.

**Preparation of V<sub>2</sub>O<sub>5</sub> HIL** The precursor solution was prepared by diluting vanadium oxytriisopropoxide with isopropyl alcohol. To fabricate the V<sub>2</sub>O<sub>5</sub> HIL, spin-coating was employed at 4,000 rpm for 45 s, followed by preheating at 150 °C for 5 min. The RTA procedures were conducted under ambient air conditions. The preheated V<sub>2</sub>O<sub>5</sub> HIL sample was further subjected to heating using tungsten lamps for 30 s at heating rates ranging from 10 to 20 K s<sup>-1</sup> per second (**Fig. S1**).

**Fabrication of QLED** ITO substrates were sonicated in acetone and isopropyl alcohol for 30 min. It was then subjected to a cleaning process involving UV-ozone treatment for 15 min. Subsequently, a V<sub>2</sub>O<sub>5</sub> HIL was deposited, as described above. PEDOT:PSS was spin-coated at 3,000 rpm for 45 s and annealed at 150 °C for 30 min. A solution of PVK (10 mg/mL in chlorobenzene) was spin-coated at 3,000 rpm for 45 s and annealed at 160 °C for 30 min. Subsequently, green CdSe/ZnSeS/ZnS QDs (optical density of 1.0, at 520 nm) were spin-coated at 3,000 rpm for 20 s and annealed at 70 °C for 30 min. The ZnMgO NPs (in ethanol at a concentration of 30–40 mg/ml) were spin-coated at 3,000 rpm for 60 s. Finally, the fabrication of the QLED was completed after thermal evaporation of a 100 nm-thick aluminum cathode.

**Characterization** X-ray diffraction (XRD) was used to assess the crystalline phases of the V<sub>2</sub>O<sub>5</sub> films using a SmartLab instrument (Rigaku). TEM using a JEOL JEM 2100F instrument was used to determine the layer thickness and calculate the lattice distances. XPS was performed using a K-alpha instrument to determine the chemical composition of the V<sub>2</sub>O<sub>5</sub> film. Surface analysis of V<sub>2</sub>O<sub>5</sub> was performed using scanning electron microscopy (SEM) (Nova NanoSEM 450, FEI). Conductive atomic force microscopy (C-AFM) with an AFM instrument from Park Systems (NX20) was used to study the surface morphologies and conductive properties of V<sub>2</sub>O<sub>5</sub>. Ultraviolet photoelectron spectroscopy (UPS) was used to evaluate the band levels of each layer using an XPS theta probe machine (Thermo Fisher Scientific Co.) equipped with a He<sup>1s</sup>-photon source at 21.2 eV. UV–VIS spectra were acquired using a UV/VIS spectrophotometer (Optizen POP-S). The current density–voltage–luminance (J–V–L) characteristics of the devices were measured using a spectroradiometer (CS-2000, Konica Minolta) with a Keithley 2400 source meter under ambient conditions. Optical simulations were performed using commercial software (Setfos, Fluxim). The refractive index measurements were conducted via spectroscopic ellipsometry using an Elli-SE(UV)-FM8 instrument from Ellipso Technology Company, Ltd.

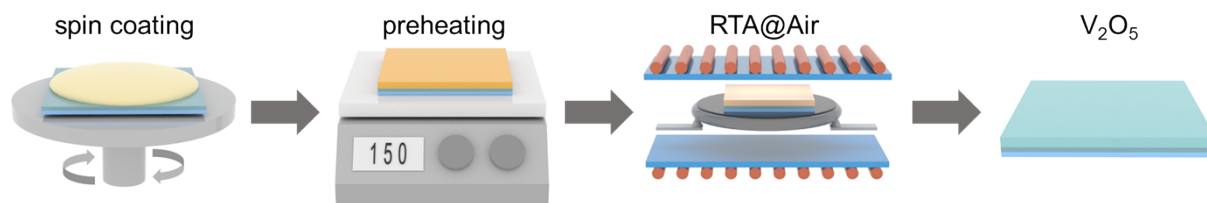

**Fig. S1** Schematic diagram for synthesizing A4 and A8 thin films.

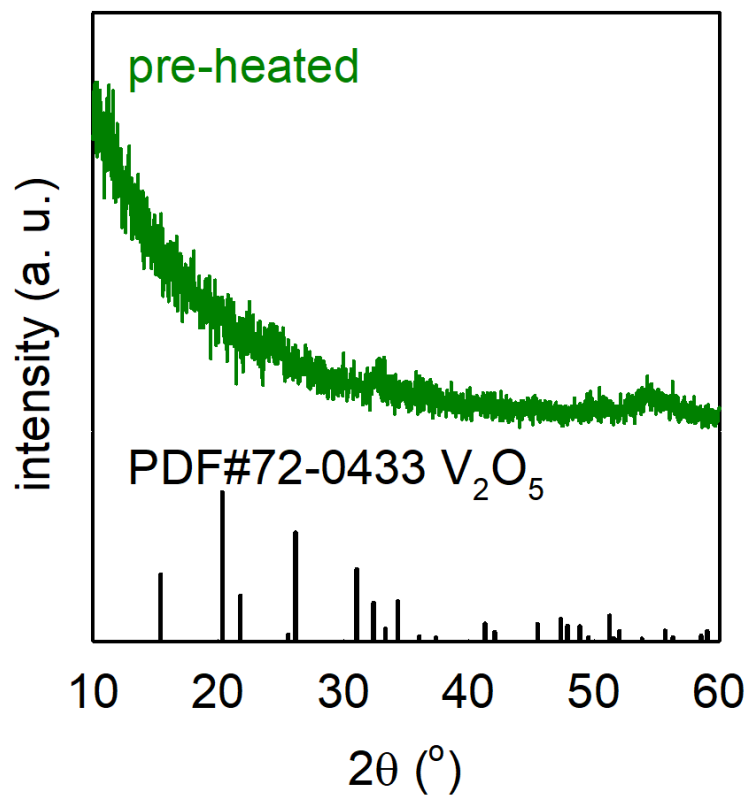

**Fig. S2** XRD patterns of pre-heated sample.

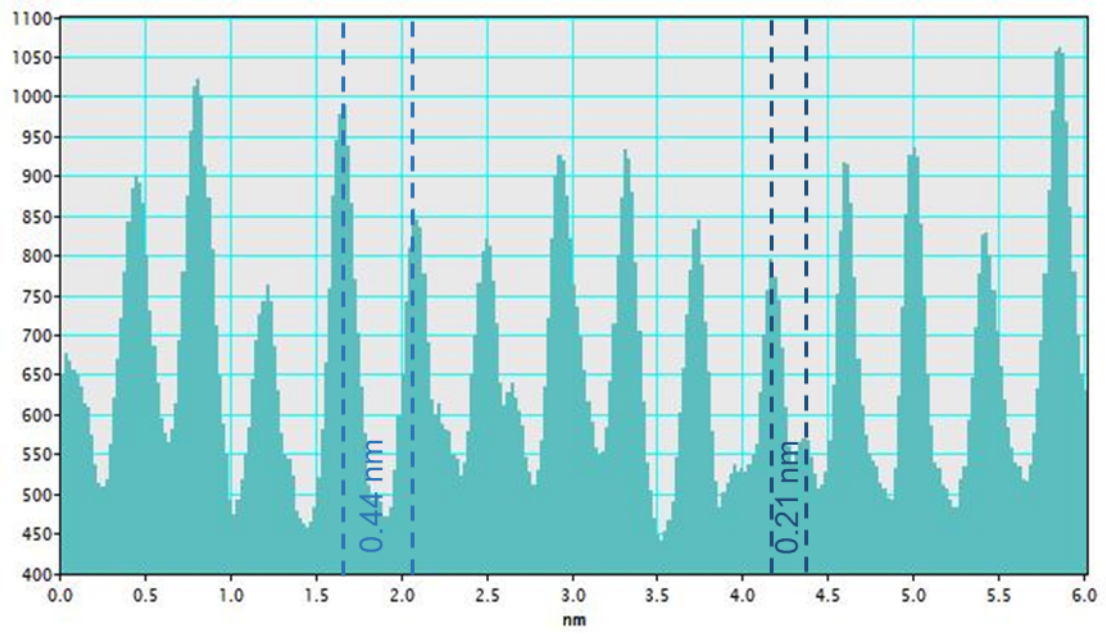

**Fig. S3** Line-scanning intensity profiles of V<sub>2</sub>O<sub>5</sub> film.

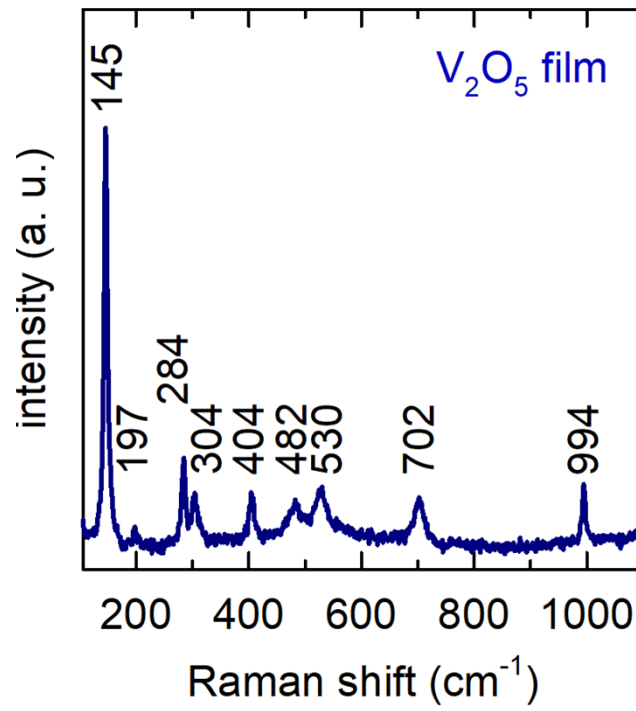

**Fig. S4** Raman spectra of  $V_2O_5$  thin film.

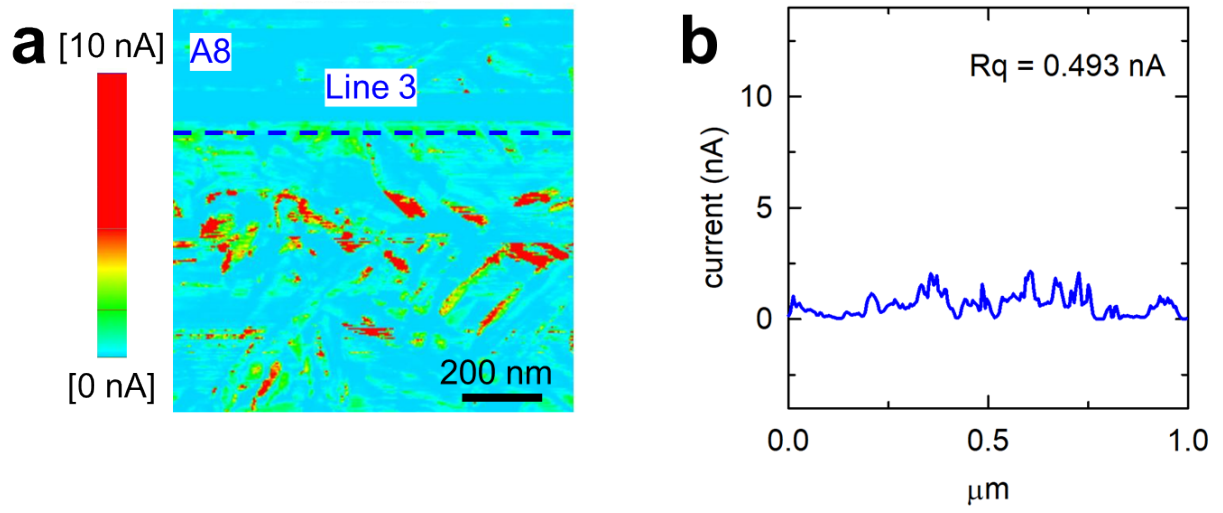

**Fig. S5** Conductive AFM and line profile of A8 low crystalline area.

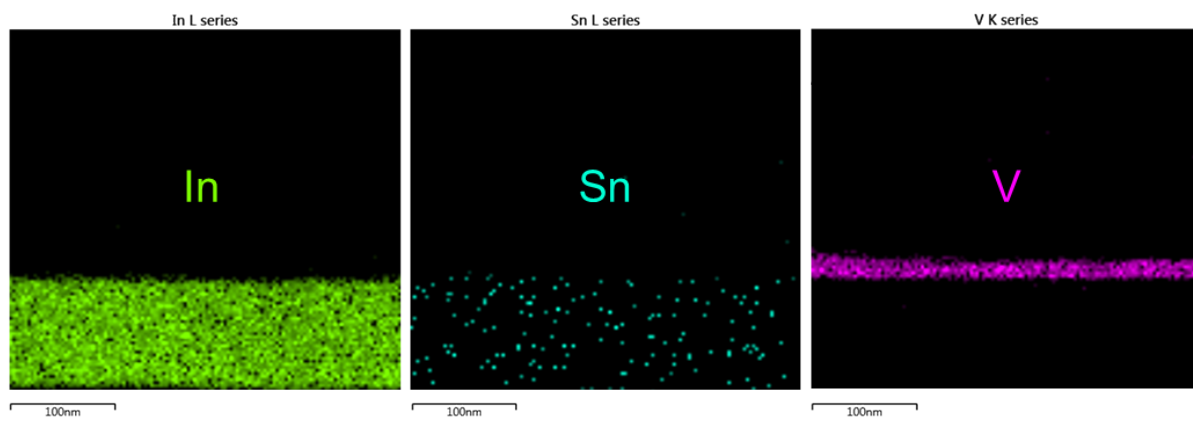

**Fig. S6** Dispersive spectroscopy (EDS) mapping images.



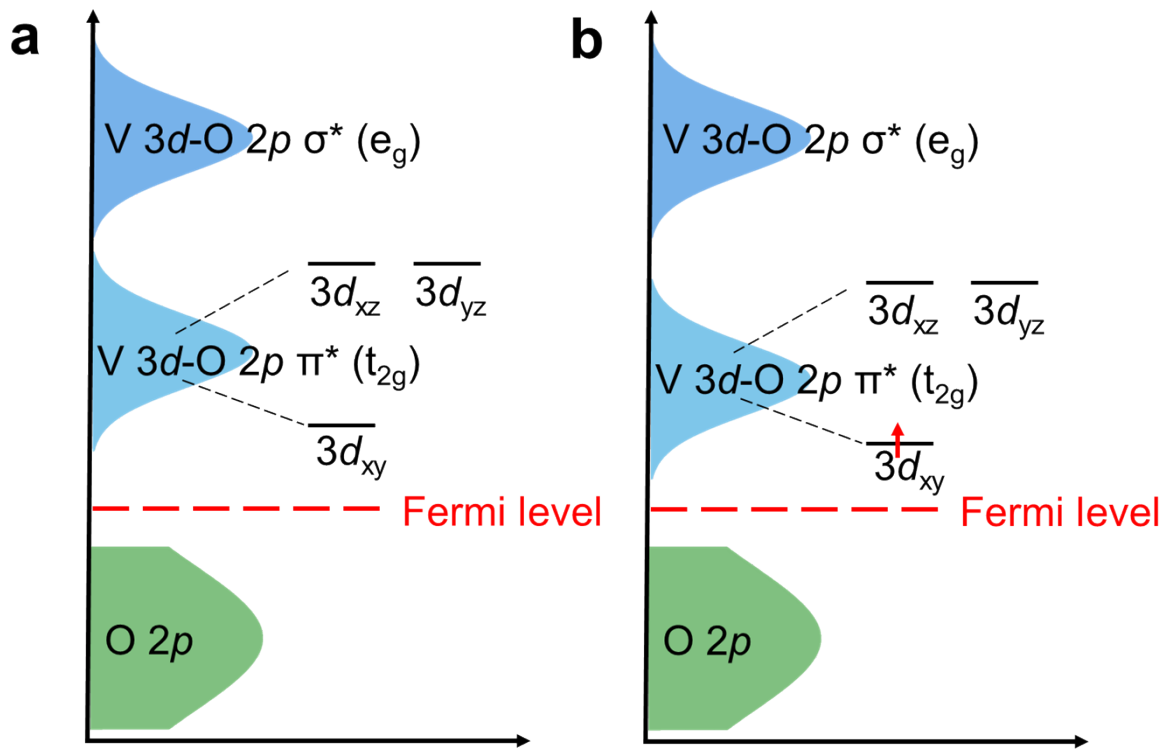

**Fig. S7** Density of states of (a)  $V_2O_5$  and (b)  $V_2O_5$  with one electron.

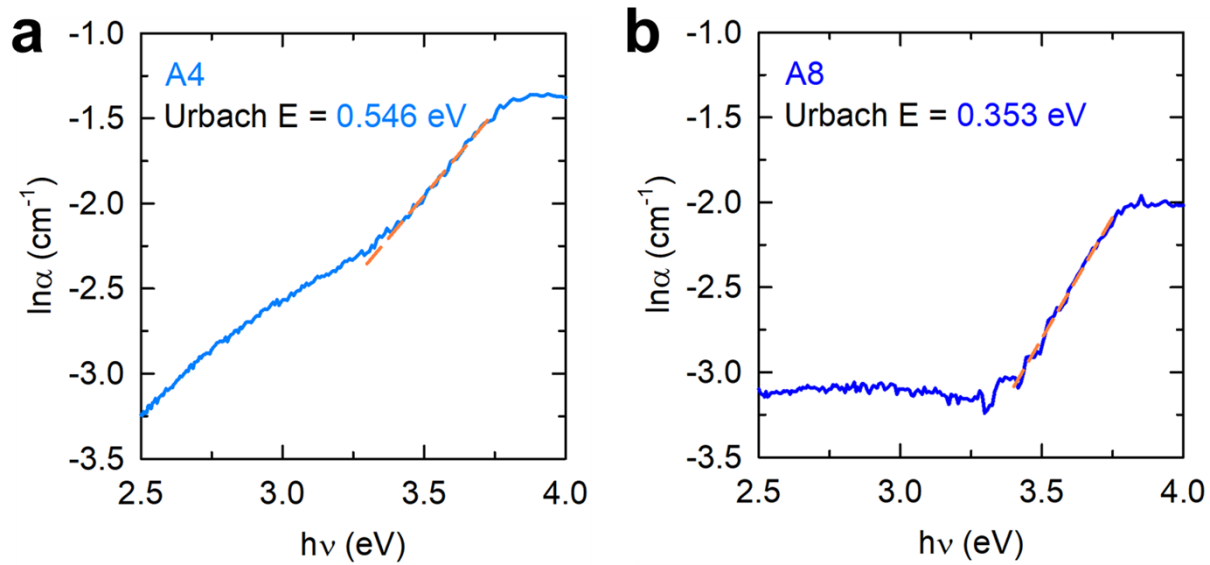

**Fig. S8** Urbach plots of A4 and A8.

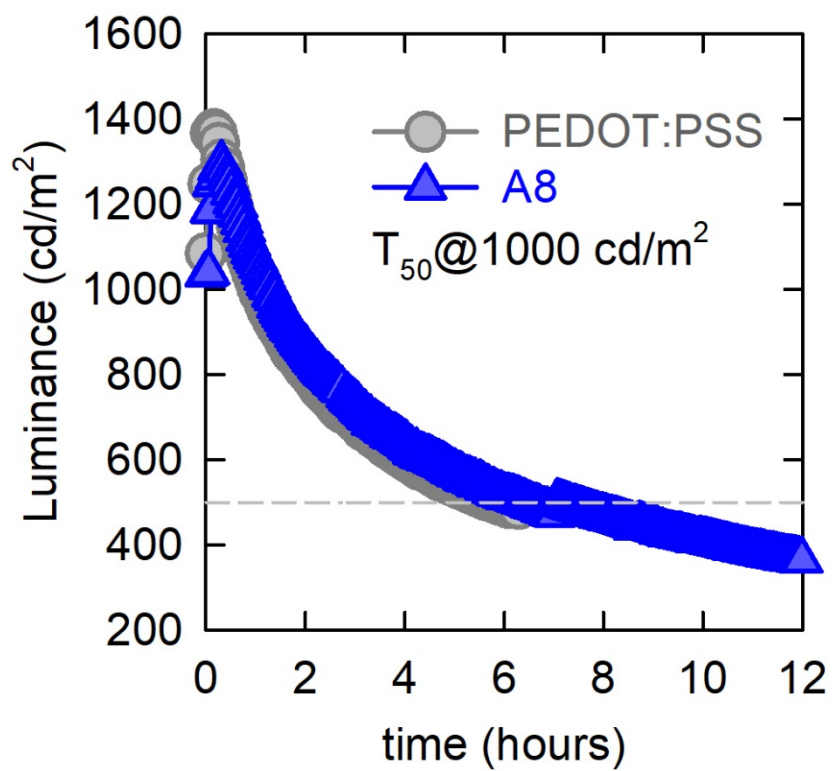

**Fig. S9** Device lifetime of PEDOT:PSS-based QLED and A8/PEDOT:PSS QLED, showing T<sub>50</sub> under a constant current density at an initial luminance of 1000 cd/m<sup>2</sup>.

**Table S1** Transmittance and refractive index of A4 and A8.

| <b>Materials</b> | <b>Transmittance<br/>[%]</b> | <b>Refractive<br/>index</b> |
|------------------|------------------------------|-----------------------------|
| <b>A4</b>        | 98.74                        | 1.86                        |
| <b>A8</b>        | 98.46                        | 1.90                        |
